# Supplementary material for: NASICON-type Na3.6Lu1.8−x(PO4)3:xEu3+ phosphors: structure and luminescence
Source: Royal Society of Chemistry journal article supplement (doi:10.1039/d2dt01741e), 2022-01-01
Supplement: d2dt01741e1.pdf [file d2dt01741e1.pdf]

## Supplementary Information

# **NASICON-type** $\text{Na}_{3.6}\text{Lu}_{1.8-x}(\text{PO}_4)_3:x\text{Eu}^{3+}$ phosphors: structure and luminescence

Nataliya Krutyak, Dmitry Spassky, Dina V. Deyneko, Andrey Antropov, Vladimir A. Morozov,  
Bogdan I. Lazoryak, Vitali Nagirnyi

**Table S1.** Element analysis results of  $\text{Na}_{3.6}\text{Lu}_{1.8-x}(\text{PO}_4)_3:x\text{Eu}^{3+}$  ( $x = 0, 0.3$ ).

| NLPO: $x\text{Eu}$ | P, at. %         | Lu, at. %        | Eu, at. %       | P:Lu:Eu ratio     |
|--------------------|------------------|------------------|-----------------|-------------------|
| $x = 0$            | $63.81 \pm 0.45$ | $36.19 \pm 0.45$ | -               | 3:1.70(3):0       |
| $x = 0.30$         | $62.99 \pm 0.57$ | $31.07 \pm 0.35$ | $5.94 \pm 0.23$ | 3:1.48(4):0.28(2) |

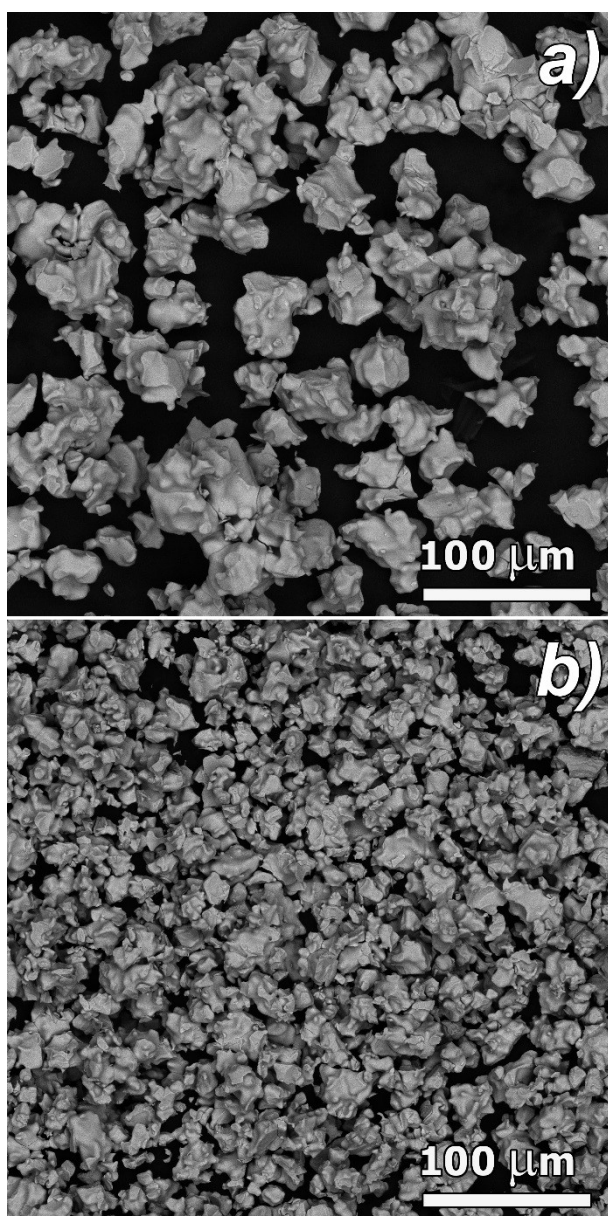

**Figure S1.** SEM images of  $\text{Na}_{3.6}\text{Lu}_{1.8-x}(\text{PO}_4)_3:x\text{Eu}^{3+}$  ( $x = 0$  (a), 0.3 (b)).

**Table S2.** The unit cell parameters for Na<sub>3.6</sub>Lu<sub>1.8-x</sub>(PO<sub>4</sub>)<sub>3</sub>:xEu<sup>3+</sup>.

| <i>x</i> | <i>a</i> , Å | <i>c</i> , Å | <i>V</i> , Å <sup>3</sup> |
|----------|--------------|--------------|---------------------------|
| 0.05     | 9.1050(2)    | 22.2467(6)   | 1597.17(6)                |
| 0.1      | 9.1080(3)    | 22.2086(1)   | 1595.51(7)                |
| 0.3      | 9.1176(2)    | 22.1982(7)   | 1598.12(7)                |
| 0.4      | 9.1208(2)    | 22.1803(6)   | 1597.94(6)                |
| 0.45     | 9.1216(1)    | 22.1409(4)   | 1595.39(5)                |
| 0.5      | 9.1259(2)    | 22.1473(8)   | 1597.37(8)                |
| 0.6      | 9.1263(2)    | 22.1375(8)   | 1596.80(8)                |
| 0.7      | 9.1335(1)    | 22.1481(9)   | 1600.08(5)                |

**Table S3.** Atomic coordinates, isotropic displacement atomic parameters (*U*<sub>iso</sub>), site occupation of Na<sub>3.6</sub>Lu<sub>1.8</sub>(PO<sub>4</sub>)<sub>3</sub> and anisotropic temperature factors (*U*<sub>ij</sub> in Å<sup>2</sup>) of the Lu site.

| Position | <i>x</i>               | <i>y</i>               | <i>z</i>               | <i>U</i> <sub>iso</sub> *100, Å <sup>2</sup> | Occupancy                |                        |
|----------|------------------------|------------------------|------------------------|----------------------------------------------|--------------------------|------------------------|
| Lu       | 0                      | 0                      | 0.15551(8)             | 1.22(5)                                      | 0.950(9)Lu               |                        |
| Na4      | 0                      | 0                      | 0.15551(8)             | 0.00(1)                                      | 0.050(9)Na               |                        |
| Na1      | 0.138(3)               | 0.077(5)               | 0.0232(10)             | 0.26(12)                                     | 0.268(11)Na <sup>+</sup> |                        |
| Na2      | 0.6655(16)             | 0                      | 0.25                   | 0.32(9)                                      | 0.453(8)Na <sup>+</sup>  |                        |
| Na3      | 0                      | 0                      | 0.25                   | 0.9(2)                                       | 0.53(3)Na <sup>+</sup>   |                        |
| P1       | 0.2959(7)              | 0                      | 0.25                   | 0.9(2)                                       | 1P                       |                        |
| O1       | 0.214(1)               | -0.0207(9)             | 0.1825(5)              | 0.7(2)                                       | 1O                       |                        |
| O2       | 0.1996(10)             | 0.1762(11)             | 0.0966(5)              | 0.7(2)                                       | 1O                       |                        |
|          | <i>U</i> <sup>11</sup> | <i>U</i> <sup>22</sup> | <i>U</i> <sup>33</sup> | <i>U</i> <sup>12</sup>                       | <i>U</i> <sup>13</sup>   | <i>U</i> <sup>23</sup> |
| Lu       | 0.0023(5)              | 0.0023(5)              | 0.032(1)               | 0.0011(3)                                    | 0                        | 0                      |

**Table S4.** Selected bond lengths (Å) and angles (°) for Na<sub>3.6</sub>Lu<sub>1.8</sub>(PO<sub>4</sub>)<sub>3</sub>.

| Polyhedron              | Distance | <i>d</i> , Å | Polyhedron              | Distance              | <i>d</i> , Å |
|-------------------------|----------|--------------|-------------------------|-----------------------|--------------|
| <b>Na1O<sub>6</sub></b> | Na1-O1   | 2.46(6)      | <b>Na2O<sub>8</sub></b> | Na2-O1×2              | 2.428(4)     |
|                         | Na1-O1   | 3.06(5)      |                         | Na2-O1×2              | 2.946(9)     |
|                         | Na1-O2   | 1.82(3)      |                         | Na2-O2×2              | 2.472(11)    |
|                         | Na1-O2   | 2.74(4)      |                         | Na2-O2×2              | 2.828(18)    |
|                         | Na1-O2   | 2.91(3)      |                         | <Na2-O>               | 2.669        |
|                         | Na1-O2   | 3.12(3)      |                         | <b>PO<sub>4</sub></b> | P-O1×2       |
| <Na1-O>                 | 2.69     | P-O1×2       | 1.529(8)                |                       |              |
|                         |          | <P-O>        | 1.590                   |                       |              |

| <b>(Lu/Na4)O<sub>6</sub> - octahedron</b> |           |           |           |          |          |          |
|-------------------------------------------|-----------|-----------|-----------|----------|----------|----------|
| Lu/Na4                                    | O1        | O1        | O1        | O2       | O2       | O2       |
| O1                                        | 2.1372(5) | 112.40(4) | 112.40(4) | 76.8(3)  | 78.9(3)  | 158.9(3) |
| O1                                        |           | 2.1372(5) | 112.40(4) | 78.9(3)  | 158.9(3) | 76.8(3)  |
| O1                                        |           |           | 2.1372(5) | 158.9(3) | 76.8(3)  | 78.9(3)  |
| O2                                        |           |           |           | 2.166(9) | 87.0(4)  | 87.0(4)  |
| O2                                        |           |           |           |          | 2.166(9) | 87.0(4)  |
| O2                                        |           |           |           |          |          | 2.166(9) |
| <(Lu/Na4)-<br>>O>                         | 2.1516    |           |           |          |          |          |

  

| <b>Na3O<sub>6</sub>- polyhedron</b> |          |          |          |          |          |          |
|-------------------------------------|----------|----------|----------|----------|----------|----------|
| Na3                                 | O1       | O1       | O1       | O1       | O1       | O1       |
| O1                                  | 2.545(3) | 88.5(3)  | 88.5(3)  | 73.14(4) | 125.6(4) | 139.5(4) |
| O1                                  |          | 2.545(3) | 88.5(3)  | 139.5(4) | 73.14(4) | 125.6(4) |
| O1                                  |          |          | 2.545(3) | 125.6(4) | 139.5(4) | 73.14(4) |
| O1                                  |          |          |          | 2.545(3) | 88.5(3)  | 88.5(3)  |
| O1                                  |          |          |          |          | 2.545(3) | 88.5(3)  |
| O1                                  |          |          |          |          |          | 2.545(3) |

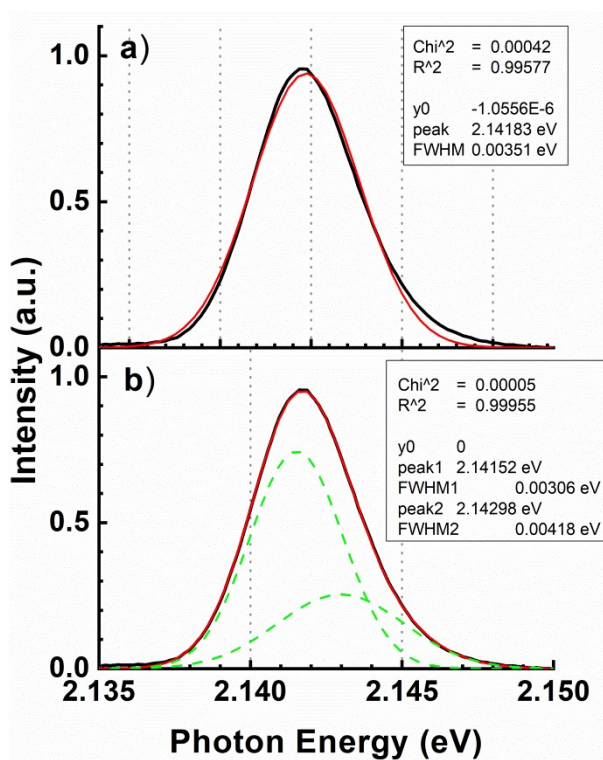

**Figure S2.** Fitting of the peak 2.141 eV (579 nm,  $^5D_0 \rightarrow ^7F_0$  transitions) of  $\text{Na}_{3.6}\text{Lu}_{1.3}(\text{PO}_4)_3:0.5\text{Eu}^{3+}$  with single (a) and two (b) Gaussian functions.
