# Supplementary material for: NASICON-type Na3.6Lu1.8−x(PO4)3:xEu3+ phosphors: structure and luminescence
Source: Royal Society of Chemistry journal article supplement (doi:10.1039/d2dt01741e), 2022-01-01
Supplement: d2dt01741e2.pdf [file d2dt01741e2.pdf]

## Supplementary Information

# NASICON-type $\text{Na}_{3.6}\text{Lu}_{1.8-x}(\text{PO}_4)_3:x\text{Eu}^{3+}$ phosphors: structure and luminescence

Nataliya Krutyak, Dmitry Spassky, Dina V. Deyneko, Andrey Antropov, Vladimir A. Morozov,  
Bogdan I. Lazoryak, Vitali Nagirnyi

**Table S1.** Element analysis results of  $\text{Na}_{3.6}\text{Lu}_{1.8-x}(\text{PO}_4)_3:x\text{Eu}^{3+}$  ( $x = 0, 0.3$ ).

| NLPO: $x\text{Eu}$ | P, at. %         | Lu, at. %        | Eu, at. %       | P:Lu:Eu ratio     |
|--------------------|------------------|------------------|-----------------|-------------------|
| $x = 0$            | $63.81 \pm 0.45$ | $36.19 \pm 0.45$ | -               | 3:1.70(3):0       |
| $x = 0.30$         | $62.99 \pm 0.57$ | $31.07 \pm 0.35$ | $5.94 \pm 0.23$ | 3:1.48(4):0.28(2) |

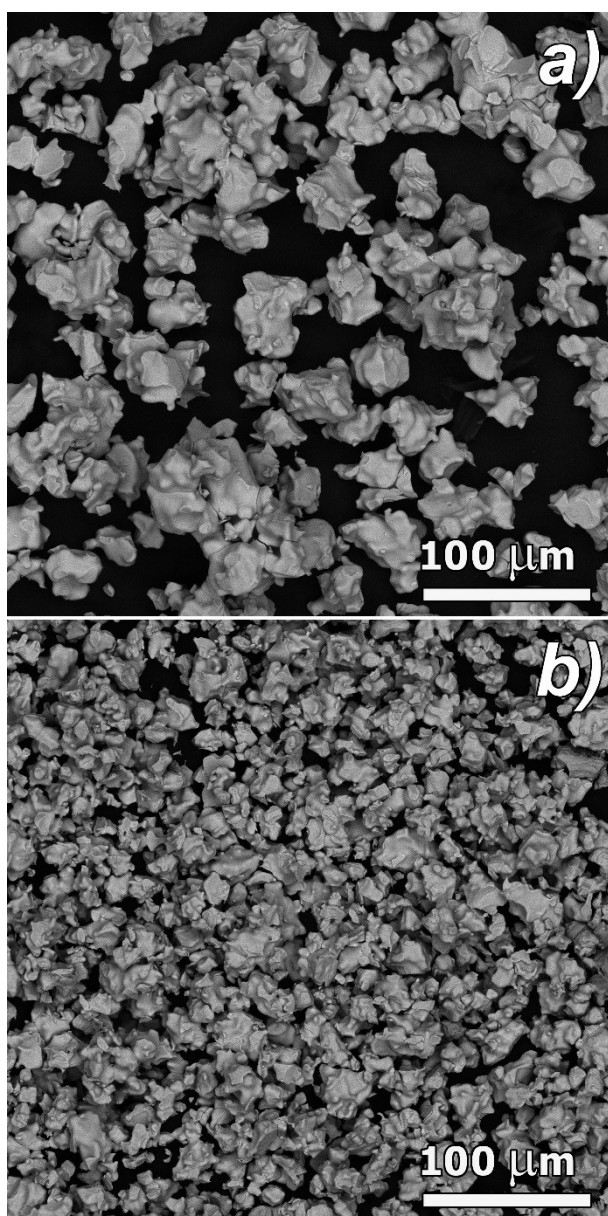

**Figure S1.** SEM images of  $\text{Na}_{3.6}\text{Lu}_{1.8-x}(\text{PO}_4)_3:x\text{Eu}^{3+}$  ( $x = 0$  (a),  $0.3$  (b)).

**Table S2.** The unit cell parameters for  $\text{Na}_{3.6}\text{Lu}_{1.8-x}(\text{PO}_4)_3:x\text{Eu}^{3+}$ .

| $x$  | $a, \text{Å}$ | $c, \text{Å}$ | $V, \text{Å}^3$ |
|------|---------------|---------------|-----------------|
| 0.05 | 9.1050(2)     | 22.2467(6)    | 1597.17(6)      |
| 0.1  | 9.1080(3)     | 22.2086(1)    | 1595.51(7)      |
| 0.3  | 9.1176(2)     | 22.1982(7)    | 1598.12(7)      |
| 0.4  | 9.1208(2)     | 22.1803(6)    | 1597.94(6)      |
| 0.45 | 9.1216(1)     | 22.1409(4)    | 1595.39(5)      |
| 0.5  | 9.1259(2)     | 22.1473(8)    | 1597.37(8)      |
| 0.6  | 9.1263(2)     | 22.1375(8)    | 1596.80(8)      |
| 0.7  | 9.1335(1)     | 22.1481(9)    | 1600.08(5)      |

**Table S3.** Atomic coordinates, isotropic displacement atomic parameters ( $U_{\text{iso}}$ ), site occupation of  $\text{Na}_{3.6}\text{Lu}_{1.8}(\text{PO}_4)_3$  and anisotropic temperature factors ( $U_{ij}$  in  $\text{Å}^2$ ) of the Lu site.

| Position | $x$        | $y$        | $z$        | $U_{\text{iso}}*100, \text{Å}^2$ | Occupancy                |          |
|----------|------------|------------|------------|----------------------------------|--------------------------|----------|
| Lu       | 0          | 0          | 0.15551(8) | 1.22(5)                          | 0.950(9)Lu               |          |
| Na4      | 0          | 0          | 0.15551(8) | 0.00(1)                          | 0.050(9)Na               |          |
| Na1      | 0.138(3)   | 0.077(5)   | 0.0232(10) | 0.26(12)                         | 0.268(11)Na <sup>+</sup> |          |
| Na2      | 0.6655(16) | 0          | 0.25       | 0.32(9)                          | 0.453(8)Na <sup>+</sup>  |          |
| Na3      | 0          | 0          | 0.25       | 0.9(2)                           | 0.53(3)Na <sup>+</sup>   |          |
| P1       | 0.2959(7)  | 0          | 0.25       | 0.9(2)                           | 1P                       |          |
| O1       | 0.214(1)   | -0.0207(9) | 0.1825(5)  | 0.7(2)                           | 1O                       |          |
| O2       | 0.1996(10) | 0.1762(11) | 0.0966(5)  | 0.7(2)                           | 1O                       |          |
|          | $U^{11}$   | $U^{22}$   | $U^{33}$   | $U^{12}$                         | $U^{13}$                 | $U^{23}$ |
| Lu       | 0.0023(5)  | 0.0023(5)  | 0.032(1)   | 0.0011(3)                        | 0                        | 0        |

**Table S4.** Selected bond lengths ( $\text{Å}$ ) and angles ( $^\circ$ ) for  $\text{Na}_{3.6}\text{Lu}_{1.8}(\text{PO}_4)_3$ .

| Polyhedron              | Distance | $d, \text{Å}$ | Polyhedron              | Distance              | $d, \text{Å}$ |
|-------------------------|----------|---------------|-------------------------|-----------------------|---------------|
| <b>Na1O<sub>6</sub></b> | Na1-O1   | 2.46(6)       | <b>Na2O<sub>8</sub></b> | Na2-O1×2              | 2.428(4)      |
|                         | Na1-O1   | 3.06(5)       |                         | Na2-O1×2              | 2.946(9)      |
|                         | Na1-O2   | 1.82(3)       |                         | Na2-O2×2              | 2.472(11)     |
|                         | Na1-O2   | 2.74(4)       |                         | Na2-O2×2              | 2.828(18)     |
|                         | Na1-O2   | 2.91(3)       |                         | <Na2-O>               | 2.669         |
|                         | Na1-O2   | 3.12(3)       |                         | <b>PO<sub>4</sub></b> | P-O1×2        |
| <Na1-O>                 | 2.69     | P-O1×2        | 1.529(8)                |                       |               |
|                         |          | <P-O>         | 1.590                   |                       |               |

| <b>(Lu/Na4)O<sub>6</sub> - octahedron</b> |           |           |           |          |          |          |
|-------------------------------------------|-----------|-----------|-----------|----------|----------|----------|
| Lu/Na4                                    | O1        | O1        | O1        | O2       | O2       | O2       |
| O1                                        | 2.1372(5) | 112.40(4) | 112.40(4) | 76.8(3)  | 78.9(3)  | 158.9(3) |
| O1                                        |           | 2.1372(5) | 112.40(4) | 78.9(3)  | 158.9(3) | 76.8(3)  |
| O1                                        |           |           | 2.1372(5) | 158.9(3) | 76.8(3)  | 78.9(3)  |
| O2                                        |           |           |           | 2.166(9) | 87.0(4)  | 87.0(4)  |
| O2                                        |           |           |           |          | 2.166(9) | 87.0(4)  |
| O2                                        |           |           |           |          |          | 2.166(9) |
| <(Lu/Na4)-<br>>O>                         | 2.1516    |           |           |          |          |          |
| <b>Na3O<sub>6</sub>- polyhedron</b>       |           |           |           |          |          |          |
| Na3                                       | O1        | O1        | O1        | O1       | O1       | O1       |
| O1                                        | 2.545(3)  | 88.5(3)   | 88.5(3)   | 73.14(4) | 125.6(4) | 139.5(4) |
| O1                                        |           | 2.545(3)  | 88.5(3)   | 139.5(4) | 73.14(4) | 125.6(4) |
| O1                                        |           |           | 2.545(3)  | 125.6(4) | 139.5(4) | 73.14(4) |
| O1                                        |           |           |           | 2.545(3) | 88.5(3)  | 88.5(3)  |
| O1                                        |           |           |           |          | 2.545(3) | 88.5(3)  |
| O1                                        |           |           |           |          |          | 2.545(3) |

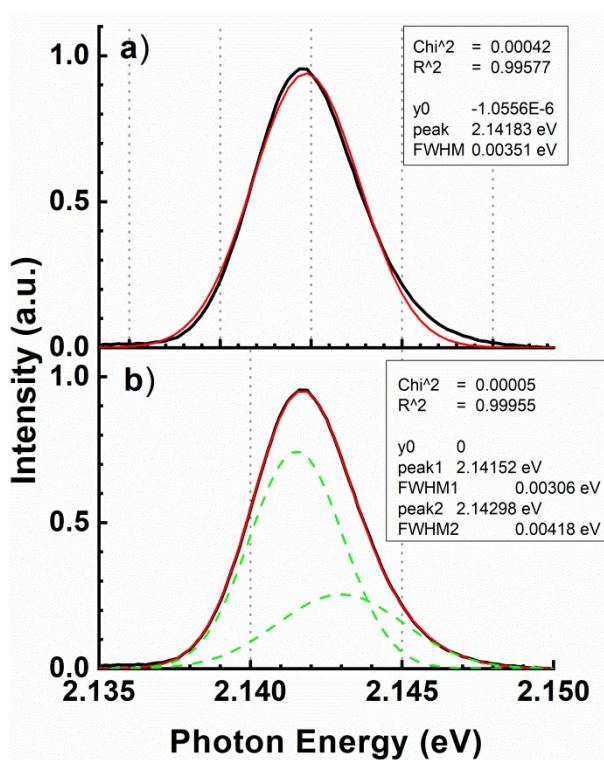

**Figure S2.** Fitting of the peak 2.141 eV (579 nm,  $^5D_0 \rightarrow ^7F_0$  transitions) of  $\text{Na}_{3.6}\text{Lu}_{1.3}(\text{PO}_4)_3:0.5\text{Eu}^{3+}$  with single (a) and two (b) Gaussian functions.
